# Supplementary material
Source: PubMed Central journal article supplement (PMC6092774)
Supplement: JCB713105_supplementary_material.pdf [file JCB713105_supplementary_material.pdf]

## SUPPLEMENTARY DATA

Table S1:

|          | Sham      |           | Hypoperfusion |               |
|----------|-----------|-----------|---------------|---------------|
|          | Vehicle   | DMF       | Vehicle       | DMF           |
| Cohort 1 | <b>7</b>  | <b>8</b>  | <b>13 (2)</b> | <b>9 (2)</b>  |
| Cohort 2 | <b>10</b> | <b>10</b> | <b>12 (4)</b> | <b>12 (1)</b> |

### SUPPLEMENTAL TABLE LEGEND:

#### **Table S1: The survival rate of vehicle and DMF-treated animals**

Final cohort sizes for cohort 1 (pathology) and cohort 2 (electrophysiology and inflammatory-related protein multiplex). The numbers of animals that were culled due to poor response are indicated in parenthesis. The survival rate of vehicle and DMF-treated animals was examined to determine whether DMF improved survival following severe hypoperfusion. Survival rate in vehicle-treated hypoperfused mice was 80.6%, in line with previously reported findings (Miki et al.,2009) <sup>15</sup>. The survival rate of DMF-treated animals was approximately 87.5% however this was not significantly different (p= 0.458, log-rank test).

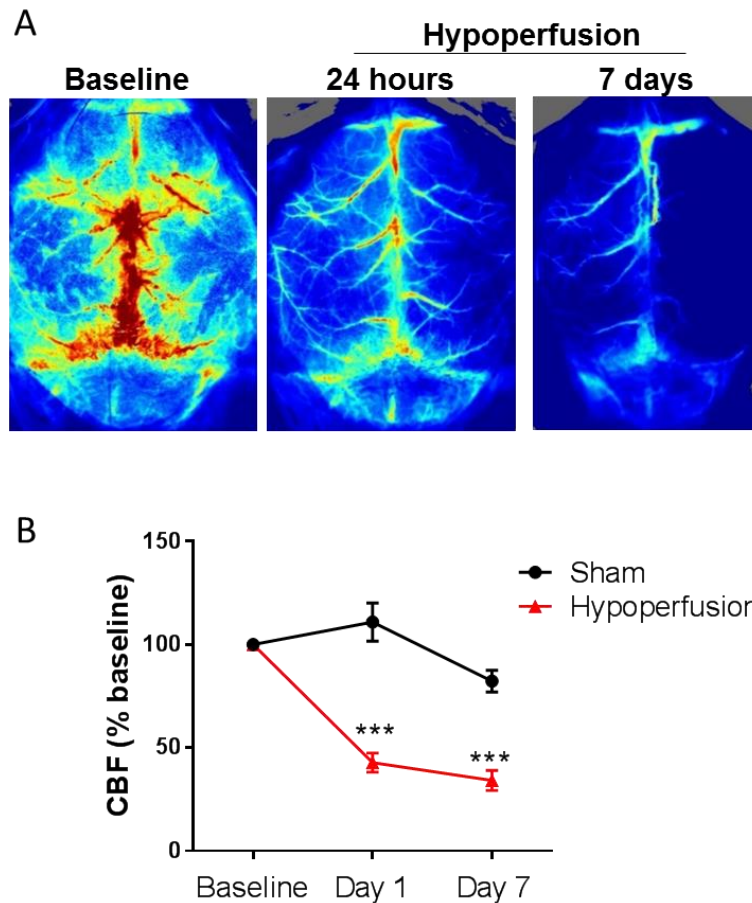

**Figure S1: Cerebral blood flow assessed with laser speckle flowmetry was reduced following severe hypoperfusion**

(A) Representative laser speckle images showing cortical blood flow imaged through the intact skull of mice at baseline and following chronic hypoperfusion. (B) Quantification of cerebral blood flow (expressed as a % of baseline value per animal). There was a significant effect of surgery ( $F_{(1,18)} = 58.2$ ,  $p < 0.0001$ ,) and of time ( $F_{(2,36)} = 51.6$ ,  $p < 0.0001$ ,) in the CBF values (% of baseline). *Post-hoc* analysis showed that there is a significant reduction in CBF in hypoperfused mice compared with sham treated mice 24 hours after surgery ( $***p < 0.001$ ) and 7 days following surgery ( $***p < 0.001$ ).

## SUPPLEMENTAL METHODS SECTION

Cortical blood flow was measured in the right hemisphere by laser speckle imaging 24 hours prior to surgery and at day 1 and 7 after surgery. Animals were anaesthetised with 5% isoflurane in oxygen in an anaesthetic chamber before being transferred to a stereotaxic frame where the head was fixed into position. Anaesthesia was maintained at 2-2.5% isoflurane via a nose cone and body temperature constantly monitored using a rectal probe and maintained at 37°C using a heating blanket. An incision was made down the midline of the head to expose the skull ultrasound gel was applied to prevent drying. A moorFLPI2 Speckle Contrast Imager (Moor Instruments, UK) connected to a laptop computer was positioned 20 cm from the brain. Images were acquired using moorFLIP2 Measurement software (v1) at a resolution of 752 x 580 pixels and a frequency of 25 frames/second. Stable baseline blood flow in the barrel cortex was recorded for 2 minutes. Speckle contrast images were analysed using MoorFLPI-2 Review software (version 4.0).
